# Supplementary material
Source: PubMed Central journal article supplement (PMC2884227)

Biophysical Journal, Volume 98

**Supporting Material**

**Heterogeneous Diffusion of a Membrane-Bound pHLIP Peptide**

Lin Guo and Feng Gai

# Heterogeneous Diffusion of a Membrane-Bound pHLIP Peptide

Lin Guo and Feng Gai\*

Department of Chemistry, University of Pennsylvania, Philadelphia, PA 19104

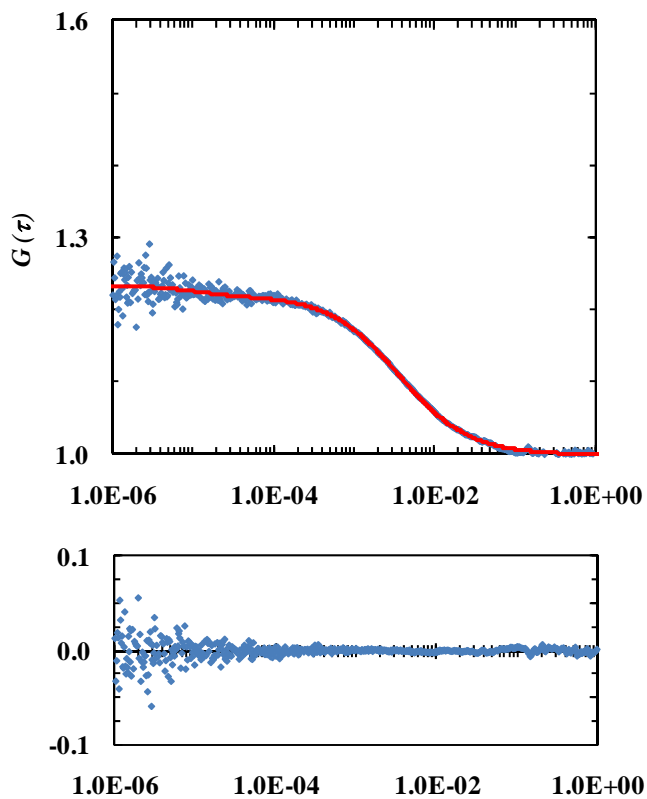

Supplement: mmc1.pdf [file mmc1.pdf]
